# Supplementary material for: Characterization of the gut microbiota and fecal metabolome in the osteosarcoma mouse model
Source: publisher site journal article supplement (doi:10.18632/aging.205951), 2024-07-03
Supplement: Supplementary file [file aging-v16-205951-supplementary-material-SD1.pdf]

SUPPLEMENTARY FIGURE

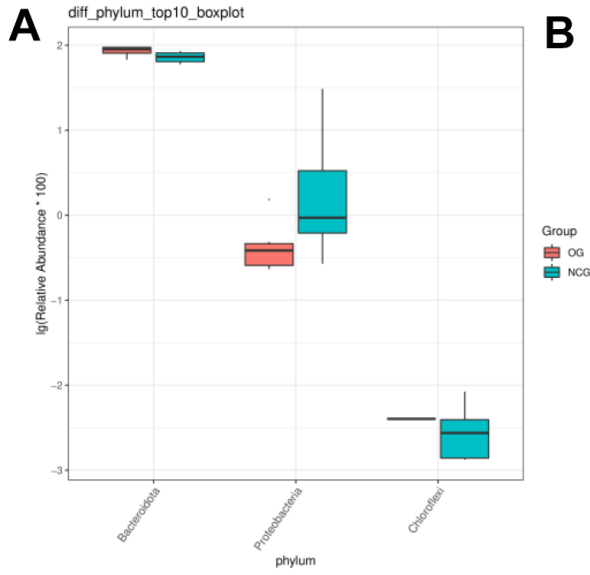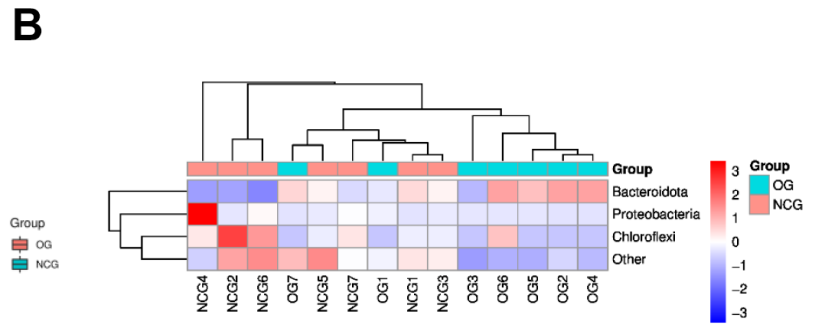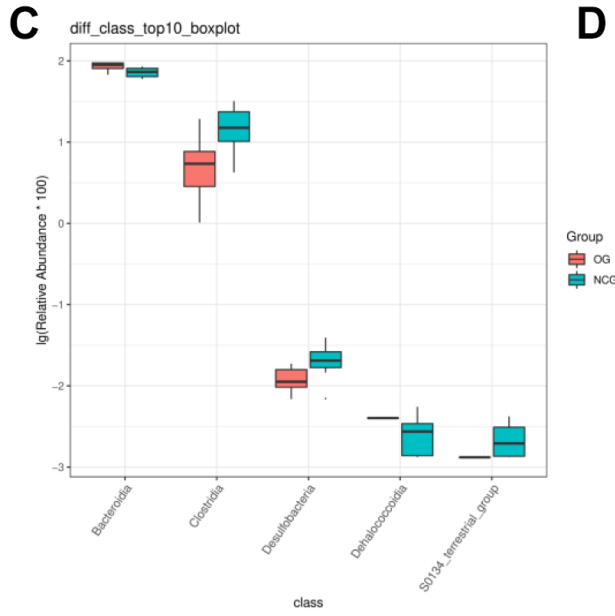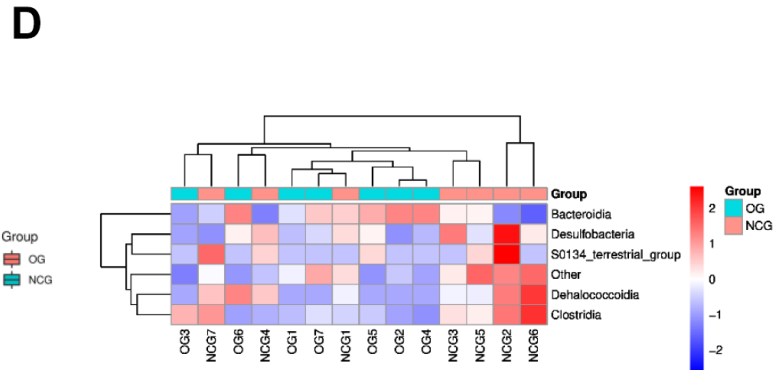

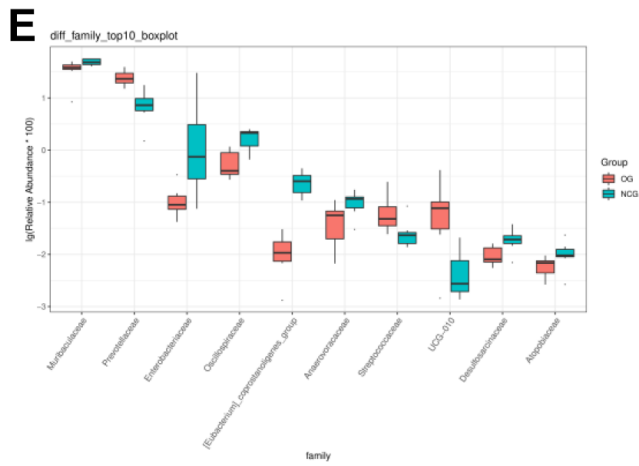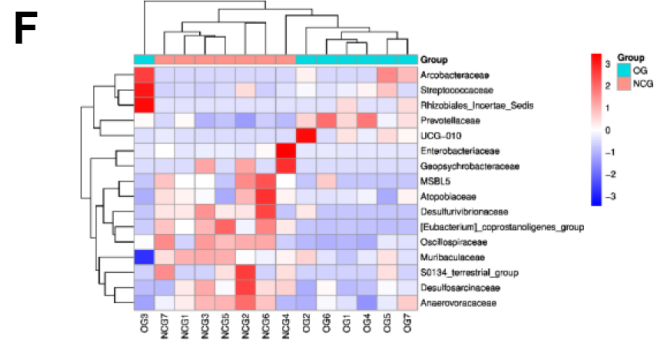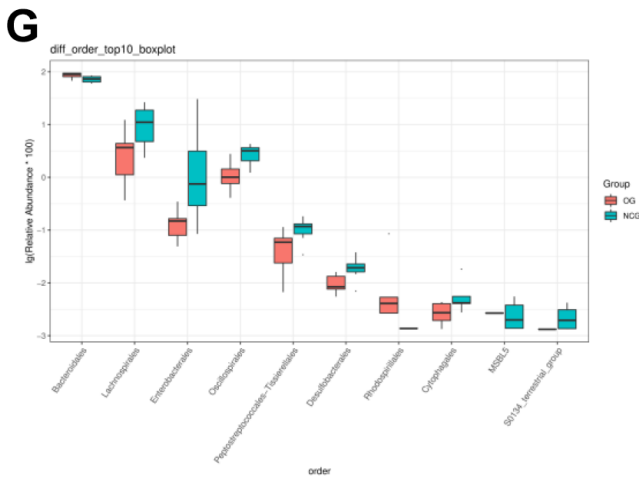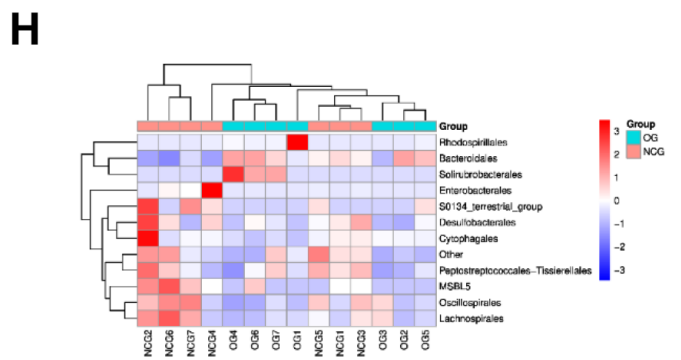

**Supplementary Figure 1. The stacked bar charts and heat maps of other levels between the two groups. (A, B) phylum-level. (C, D) class-level. (E, F) family-level. (G, H) order-level. n = 7.**
