# Supplementary material for: Characterization of the gut microbiota and fecal metabolome in the osteosarcoma mouse model
Source: publisher site journal article supplement (doi:10.18632/aging.205951), 2024-07-03
Supplement: Supplementary file [file aging-v16i13-205951-supplementary-material-SD3.pdf]

## SUPPLEMENTARY TABLE

Supplementary Table 2. Metabolic pathways associated with bone metabolism in Top10 of KEGG.

| ID       | Annotation                      | p-value              | -lg(p-value)     | Matching                                                                                                                                                                                                                |
|----------|---------------------------------|----------------------|------------------|-------------------------------------------------------------------------------------------------------------------------------------------------------------------------------------------------------------------------|
| mmu00970 | Aminoacyl-tRNA biosynthesis     | 1.09019681319946E-07 | 6.96249509181108 | L-Lysine, L-Arginine, L-Glutamine, L-Serine, L-tryptophan, L-Phenylalanine, Benzenepropanoic acid, Leucine, L-Histidine, L-Proline, L-Valine, L-threonine, L-isoleucine                                                 |
| mmu04150 | mTOR signaling pathway          | 0.000279653418412148 | 3.55337986759817 | Adenosine-5'-monophosphate, L-Arginine, Leucine                                                                                                                                                                         |
| mmu00330 | Arginine and proline metabolism | 0.00032755871560812  | 3.48471084046909 | L-Arginine, Ornithine, Putrescine, L-proline, Creatine, Spermidine, 5-aminovaleric acid, Creatinine, 4-hydroxyproline, N2-Succinyl-L-ornithine, (2E)-N-(4-aminobutyl)-3-(4-hydroxy-3-methoxyphenyl)prop-2-enimidic acid |
